# Supplementary material for: Sex separation unveils the functional plasticity of the vomeronasal organ in rabbits
Source: Front Mol Neurosci. 2022 Oct 21;15:1034254. doi: 10.3389/fnmol.2022.1034254 (PMC9634631; doi:10.3389/fnmol.2022.1034254)
Supplement: Supplementary file 2 [file Table_1.XLSX]

## Sheet: SF vs SM juvenile
Row.names	baseMean	log2FoldChange	lfcSE	stat	pvalue	padj	Gene.stable.ID.version	Gene.description	Chromosome.scaffold.name	Gene.start..bp.	Gene.end..bp.	Strand	Gene.name	UniProtKB.Gene.Name.symbol	HGNC.symbol	Transcript.length..longest.			up regulated in females
ENSOCUG00000024479	480.21	-5.15363	0.348554	-14.7858	1.80968e-49	1.37463e-45	ENSOCUG00000024479.2	60S ribosomal protein L15	16	7439690	7480120	-1	RPL15	RPL15	RL15	1002			up regulated in males
ENSOCUG00000015167	144.57	-5.02301	0.499741	-10.0512	9.07331e-24	3.44604e-20	ENSOCUG00000015167.4	Kappa-casein [Source:UniProtKB/Swiss-Prot;Acc:P33618]	15	79462339	79655733	-1	CSN3	CSN3	CSN3	684
ENSOCUG00000030587	262.83	-4.97772	0.30659	-16.2358	2.81768e-59	4.28063e-55	ENSOCUG00000030587.1		1	74347959	74348336	1				339
ENSOCUG00000034224	307.862	-3.82157	0.403207	-9.47795	2.59337e-21	7.87968e-18	ENSOCUG00000034224.1		3	38955553	38955930	1				303
ENSOCUG00000031697	104.354	-3.69365	0.551541	-6.69696	2.12797e-11	3.23281e-08	ENSOCUG00000031697.1		1	102184739	102186385	-1				1540
ENSOCUG00000007470	387.507	-3.35159	0.423668	-7.91089	2.55555e-15	4.85299e-12	ENSOCUG00000007470.4	zinc finger and BTB domain containing 16 [Source:HGNC Symbol;Acc:HGNC:12930]	1	102188213	102371526	-1	ZBTB16		ZBTB16	3379
ENSOCUG00000005519	29.8432	-2.65714	0.570104	-4.6608	3.14978e-06	0.00398763	ENSOCUG00000005519.4	armadillo repeat containing 12 [Source:HGNC Symbol;Acc:HGNC:21099]	12	25794976	25808030	1	ARMC12	ARMC12	ARMC12	2620
ENSOCUG00000005513	464.676	-2.64731	0.300988	-8.79539	1.42554e-18	3.09383e-15	ENSOCUG00000005513.4	FKBP prolyl isomerase 5 [Source:HGNC Symbol;Acc:HGNC:3721]	12	25474864	25754366	-1	FKBP5	FKBP5	FKBP5	1636
ENSOCUG00000025488	97.6715	-2.58975	0.673818	-3.8434	0.000121341	0.0496395	ENSOCUG00000025488.3	Oryctolagus cuniculus defensin NP-4 (LOC100009135), mRNA. [Source:RefSeq mRNA;Acc:NM_001082299]	GL018713	97167	99706	-1				501
ENSOCUG00000022335	92.0785	-2.44176	0.576065	-4.2387	2.24822e-05	0.0189749	ENSOCUG00000022335.3	Oryctolagus cuniculus defensin NP-3a (LOC100009134), mRNA. [Source:RefSeq mRNA;Acc:NM_001082298]	GL018713	71526	74171	1		LOC100009134		994
ENSOCUG00000003510	76.2177	-2.39436	0.624936	-3.83137	0.000127432	0.0496395	ENSOCUG00000003510.4	OCA2 melanosomal transmembrane protein [Source:HGNC Symbol;Acc:HGNC:8101]	17	78036010	78397189	1	OCA2		OCA2	3026
ENSOCUG00000023566	121.633	-2.20144	0.547752	-4.01904	5.8436e-05	0.03699	ENSOCUG00000023566.3	Immunoglobulin lambda variable 4-69; Flags: Precursor	21	4564806	4587133	1	IGL		LV469	552
ENSOCUG00000013268	3121.64	-1.9929	0.174552	-11.4172	3.4307e-30	1.73731e-26	ENSOCUG00000013268.4	ADP/ATP translocase 2; AltName: Full=ADP,ATP carrier protein 2; AltName: Full=Adenine nucleotide translocator 2; Short=ANT 2; AltName: Full=Solute carrier family 25 member 5; Contains: ADP/ATP translocase 2, N-terminally processed	X	68185720	68188506	1	SLC25A5	SLC25A5	ADT2	1252
ENSOCUG00000021974	106.731	-1.81427	0.472446	-3.84018	0.000122946	0.0496395	ENSOCUG00000021974.3	Glutamate receptor ionotropic, NMDA 2C; Short=GluN2C; AltName: Full=Glutamate [NMDA] receptor subunit epsilon-3; AltName: Full=N-methyl D-aspartate receptor subtype 2C; Short=NMDAR2C; Short=NR2C; Flags: Precursor	GL018989	63159	70864	1	GRIN2C		NMDE3	3690
ENSOCUG00000013485	119.213	-1.45461	0.314478	-4.62548	3.73735e-06	0.00436753	ENSOCUG00000013485.3	Oryctolagus cuniculus potassium voltage-gated channel subfamily E regulatory subunit 1 (KCNE1), mRNA. [Source:RefSeq mRNA;Acc:NM_001109822]	GL018729	1221003	1238731	-1		KCNE1		1049
ENSOCUG00000005208	711.808	-0.94163	0.214783	-4.38411	1.16463e-05	0.0110581	ENSOCUG00000005208.3	Bifunctional methylenetetrahydrofolate dehydrogenase/cyclohydrolase, mitochondrial; Includes: NAD-dependent methylenetetrahydrofolate dehydrogenase; Includes: Methenyltetrahydrofolate cyclohydrolase; Flags: Precursor	2	112299887	112311223	-1	MTHFD2	MTHFD2	MTDC	1053
ENSOCUG00000015051	698.416	-0.862927	0.213372	-4.04425	5.2492e-05	0.0346721	ENSOCUG00000015051.3	protein phosphatase 1 regulatory subunit 3C [Source:HGNC Symbol;Acc:HGNC:9293]	18	39597126	39602191	-1	PPP1R3C	PPP1R3C	PPP1R3C	3103
ENSOCUG00000007225	670.604	0.643446	0.162759	3.95337	7.70571e-05	0.041809	ENSOCUG00000007225.2	cellular retinoic acid binding protein 2 [Source:HGNC Symbol;Acc:HGNC:2339]	13	36243166	36248144	1	CRABP2	CRABP2	CRABP2	835
ENSOCUG00000011064	5834.31	0.655692	0.171089	3.83246	0.000126868	0.0496395	ENSOCUG00000011064.4	calsyntenin 1 [Source:HGNC Symbol;Acc:HGNC:17447]	13	140505507	140535601	1	CLSTN1		CLSTN1	2856
ENSOCUG00000007136	1679.67	0.720935	0.16837	4.28186	1.85341e-05	0.016563	ENSOCUG00000007136.4	endoglin [Source:HGNC Symbol;Acc:HGNC:3349]	GL018847	663683	692319	1	ENG		ENG	3014
ENSOCUG00000026440	931.666	0.800715	0.206662	3.87452	0.000106837	0.0490725	ENSOCUG00000026440.3	Nuclear factor 1 X-type; Short=NF1-X; Short=Nuclear factor 1/X; AltName: Full=CCAAT-box-binding transcription factor; Short=CTF; AltName: Full=Nuclear factor I/X; Short=NF-I/X; Short=NFI-X; AltName: Full=TGGCA-binding protein	GL018984	26983	81300	1	NFIX		NFIX	4496
ENSOCUG00000017106	297.686	0.829756	0.202941	4.08866	4.3388e-05	0.0322631	ENSOCUG00000017106.4	Kazrin	GL018739	55399	134322	-1	KAZN		KAZRN	1491
ENSOCUG00000007488	237.579	0.914427	0.236421	3.86779	0.000109825	0.0490725	ENSOCUG00000007488.4	sushi domain containing 2 [Source:HGNC Symbol;Acc:HGNC:30667]	GL018810	723275	729910	-1	SUSD2	SUSD2	SUSD2	3162
ENSOCUG00000008785	879.555	0.920157	0.236649	3.88827	0.000100959	0.0479304	ENSOCUG00000008785.4	insulin like growth factor 2 receptor [Source:HGNC Symbol;Acc:HGNC:5467]	12	149772470	149863690	1	IGF2R		IGF2R	8094
ENSOCUG00000002381	232.376	1.0074	0.253878	3.96803	7.24685e-05	0.0407756	ENSOCUG00000002381.4	Plasma membrane calcium-transporting ATPase 4; Short=PMCA4; AltName: Full=Matrix-remodeling-associated protein 1; AltName: Full=Plasma membrane calcium ATPase isoform 4; AltName: Full=Plasma membrane calcium pump isoform 4	16	66833454	66859201	1	ENSOCUG00000002381		AT2B4	3852
ENSOCUG00000010693	154.955	1.0575	0.265908	3.97694	6.98079e-05	0.0407756	ENSOCUG00000010693.4	cellular communication network factor 3 [Source:HGNC Symbol;Acc:HGNC:7885]	3	135287190	135295010	1	CCN3	CCN3	CCN3	1451
ENSOCUG00000014744	72.5395	1.12619	0.292823	3.84598	0.000120072	0.0496395	ENSOCUG00000014744.4	Wnt family member 16 [Source:HGNC Symbol;Acc:HGNC:16267]	7	23416214	23426662	-1	WNT16	WNT16	WNT16	1696
ENSOCUG00000014946	118.031	1.33928	0.294152	4.55301	5.28838e-06	0.00573865	ENSOCUG00000014946.3	ras related dexamethasone induced 1 [Source:HGNC Symbol;Acc:HGNC:15828]	GL018920	303489	305281	-1	RASD1		RASD1	1606
ENSOCUG00000009732	354.77	1.37618	0.233242	5.90024	3.62977e-09	5.01305e-06	ENSOCUG00000009732.4	nuclear receptor subfamily 1 group D member 1 [Source:HGNC Symbol;Acc:HGNC:7962]	19	41290746	41298450	-1	NR1D1	NR1D1	NR1D1	2977
ENSOCUG00000008640	275.49	1.4673	0.334342	4.38863	1.14066e-05	0.0110581	ENSOCUG00000008640.4	S100 calcium binding protein A5 [Source:HGNC Symbol;Acc:HGNC:10495]	13	38916640	38918580	1	S100A5		S100A5	279
ENSOCUG00000029032	65.867	1.55251	0.394975	3.93066	8.47124e-05	0.0429425	ENSOCUG00000029032.2		1	54418533	54419431	1	ENSOCUG00000029032			852
ENSOCUG00000009244	107.112	1.63905	0.40133	4.08405	4.42573e-05	0.0322631	ENSOCUG00000009244.4	thrombospondin 4 [Source:HGNC Symbol;Acc:HGNC:11788]	11	747027	792208	1	THBS4		THBS4	3584
ENSOCUG00000024926	41.6697	1.71691	0.422497	4.06373	4.82951e-05	0.03335	ENSOCUG00000024926.2	NmrA-like family domain-containing protein 1	16	73476561	73478432	-1	ENSOCUG00000024926		NMRL1	861
ENSOCUG00000003873	656.556	1.73454	0.441313	3.93041	8.47995e-05	0.0429425	ENSOCUG00000003873.4	Dynein regulatory complex subunit 3; AltName: Full=Leucine-rich repeat-containing protein 48	GL019313	5716	58749	-1	DRC3		DRC3	1542
ENSOCUG00000025752	76.3791	2.47748	0.634486	3.90469	9.4345e-05	0.0462351	ENSOCUG00000025752.3	Acyl-coenzyme A synthetase ACSM4, mitochondrial; AltName: Full=Olfactory specific medium-chain acyl CoA synthetase; Short=O-MACS; Flags: Precursor	6	11633097	11667584	1	ENSOCUG00000025752		ACSM4	2915
ENSOCUG00000011112	64.5942	3.23615	0.792732	4.08227	4.45974e-05	0.0322631	ENSOCUG00000011112.4	secretoglobin family 3A member 1 [Source:HGNC Symbol;Acc:HGNC:18384]	GL018730	2003116	2003963	-1	SCGB3A1		SCGB3A1	315
ENSOCUG00000005745	458.014	3.40718	0.458139	7.437	1.03001e-13	1.73866e-10	ENSOCUG00000005745.3	Cytochrome P450 2G1 [Source:UniProtKB/Swiss-Prot;Acc:P24461]	GL018789	884179	896741	1		CYP2G1		3376
ENSOCUG00000006682	50.4219	3.70325	0.929744	3.98309	6.80254e-05	0.0407756	ENSOCUG00000006682.3	ADP/ATP translocase 2; AltName: Full=ADP,ATP carrier protein 2; AltName: Full=Adenine nucleotide translocator 2; Short=ANT 2; AltName: Full=Solute carrier family 25 member 5; Contains: ADP/ATP translocase 2, N-terminally processed	GL018789	984168	985063	1	ENSOCUG00000006682		ADT2	753
ENSOCUG00000025405	84.3842	4.24502	0.46148	9.19869	3.62331e-20	9.17422e-17	ENSOCUG00000025405.2	Rab GDP dissociation inhibitor beta; Short=Rab GDI beta; AltName: Full=Guanosine diphosphate dissociation inhibitor 2; Short=GDI-2	10	33491645	33492982	-1	GDI2		GDIB	1287

## Sheet: CF vs CM juvenile
Row.names	baseMean	log2FoldChange	lfcSE	stat	pvalue	padj	Gene.stable.ID.version	Gene.description	Chromosome.scaffold.name	Gene.start..bp.	Gene.end..bp.	Strand	Gene.name	UniProtKB.Gene.Name.symbol	HGNC.symbol	Transcript.length..longest.			up regulated in females
ENSOCUG00000035125	68.3094	-2.69943	0.540991	-4.98979	6.04434e-07	0.0140845	ENSOCUG00000035125.1		GL019040	214324	217955	1				2280			up regulated in males
ENSOCUG00000034082	538.463	2.45969	0.527574	4.66227	3.12748e-06	0.0364382	ENSOCUG00000034082.1	complement C3d receptor 2 [Source:HGNC Symbol;Acc:HGNC:2336]	16	65004985	65038243	-1	CR2		CR2	3270

## Sheet: SF vs SM adult
Row.names	baseMean	log2FoldChange	lfcSE	stat	pvalue	padj	Gene.stable.ID.version	Gene.description	Chromosome.scaffold.name	Gene.start..bp.	Gene.end..bp.	Strand	Gene.name	UniProtKB.Gene.Name.symbol	HGNC.symbol	Transcript.length..longest.			up regulated in females
ENSOCUG00000025017	209.396	-7.38311	1.69387	-4.35873	1.30818e-05	0.00382538	ENSOCUG00000025017.2	p53 apoptosis effector related to PMP-22; AltName: Full=Keratinocyte-associated protein 1; Short=KCP-1; AltName: Full=P53-induced protein PIGPC1; AltName: Full=Transmembrane protein THW	15	20401853	20506205	-1	ENSOCUG00000025017		PERP	1656			up regulated in males
ENSOCUG00000022609	218.277	-5.63503	0.610413	-9.23151	2.66848e-20	3.88637e-16	ENSOCUG00000022609.2	Oryctolagus cuniculus lipophilin BL (SCGB1D), mRNA. [Source:RefSeq mRNA;Acc:NM_001082157]	GL018717	2366163	2369564	1		SCGB1D		763
ENSOCUG00000037176	23.6422	-5.47196	0.908115	-6.02562	1.68459e-09	3.0668e-06	ENSOCUG00000037176.1	NADH dehydrogenase [ubiquinone] 1 beta subcomplex subunit 1; AltName: Full=Complex I-MNLL; Short=CI-MNLL; AltName: Full=NADH-ubiquinone oxidoreductase MNLL subunit	1	91621970	91622146	1			NDUB1	177
ENSOCUG00000007538	7946.72	-4.82328	1.22215	-3.94655	7.9285e-05	0.013781	ENSOCUG00000007538.4	BPI fold containing family A member 1 [Source:HGNC Symbol;Acc:HGNC:15749]	4	6351615	6359117	-1	BPIFA1		BPIFA1	1273
ENSOCUG00000025864	4017.78	-3.83025	1.11527	-3.43436	0.000593953	0.0494304	ENSOCUG00000025864.2	Major allergen I polypeptide chain 1; AltName: Full=AG4; AltName: Full=Allergen Cat-1; AltName: Full=Allergen Fel d I-A; Short=Allergen FdI; Short=Allergen Fel dI; AltName: Allergen=Fel d 1-A; Flags: Precursor	GL019480	44303	45623	-1	CH1		FEL1A	285
ENSOCUG00000033069	11.608	-3.12885	0.735888	-4.25179	2.12065e-05	0.00551521	ENSOCUG00000033069.1	Major allergen I polypeptide chain 1; AltName: Full=AG4; AltName: Full=Allergen Cat-1; AltName: Full=Allergen Fel d I-A; Short=Allergen FdI; Short=Allergen Fel dI; AltName: Allergen=Fel d 1-A; Flags: Precursor	GL019029	8024	9334	1			FEL1A	261
ENSOCUG00000012080	216.794	-3.0748	0.463407	-6.6352	3.24071e-11	9.43955e-08	ENSOCUG00000012080.3	solute carrier family 18 member A2 [Source:HGNC Symbol;Acc:HGNC:10935]	18	64680736	64710706	1	SLC18A2		SLC18A2	1545
ENSOCUG00000026480	88.333	-3.04886	0.79904	-3.81565	0.000135824	0.0191602	ENSOCUG00000026480.3	Aldehyde oxidase 2; AltName: Full=Aldehyde oxidase homolog 3; AltName: Full=Azaheterocycle hydroxylase 2	7	141502729	141579589	1	AOX2		AOXB	4054
ENSOCUG00000013264	39.937	-2.622	0.54902	-4.77579	1.79006e-06	0.000840178	ENSOCUG00000013264.3	Excitatory amino acid transporter 3; AltName: Full=Excitatory amino-acid carrier 1; AltName: Full=Sodium-dependent glutamate/aspartate transporter 3; AltName: Full=Solute carrier family 1 member 1	1	50011452	50067739	-1	ENSOCUG00000013264		EAA3	1998
ENSOCUG00000013644	17.3659	-2.61137	0.714668	-3.65396	0.000258222	0.0303286	ENSOCUG00000013644.3	retinoid isomerohydrolase RPE65 [Source:HGNC Symbol;Acc:HGNC:10294]	13	97789924	97812892	1	RPE65	RPE65	RPE65	2202
ENSOCUG00000017018	96.5981	-2.59179	0.466993	-5.54995	2.8575e-08	3.46805e-05	ENSOCUG00000017018.3	ring finger protein 152 [Source:HGNC Symbol;Acc:HGNC:26811]	9	102144307	102144918	-1	RNF152	RNF152	RNF152	612
ENSOCUG00000016954	19.2565	-2.5608	0.734068	-3.4885	0.000485731	0.0451067	ENSOCUG00000016954.4	Coiled-coil domain-containing protein 141; AltName: Full=Coiled-coil protein associated with myosin II and DISC1	7	118537451	118752039	-1	ENSOCUG00000016954	CCDC141	CC141	4590
ENSOCUG00000017054	155.926	-2.36078	0.539182	-4.37845	1.19526e-05	0.00370379	ENSOCUG00000017054.4	testis expressed 33 [Source:HGNC Symbol;Acc:HGNC:28568]	4	84943770	84951432	1	TEX33	TEX33	TEX33	759
ENSOCUG00000037662	33.7754	-2.29709	0.556693	-4.12631	3.68629e-05	0.00789517	ENSOCUG00000037662.1		AAGW02083905	3879	5185	1				1307
ENSOCUG00000015676	65.0918	-2.24178	0.615255	-3.64366	0.000268793	0.0309716	ENSOCUG00000015676.3	Cholecystokinin; Short=CCK; Contains: Cholecystokinin-58; Short=CCK58; Contains: Cholecystokinin-58 desnonopeptide; AltName: Full=(1-49)-CCK58; Contains: Cholecystokinin-39; Short=CCK39; Contains: Cholecystokinin-33; Short=CCK33; Contains: Cholecystokinin-25; Short=CCK25; Contains: Cholecystokinin-18; Short=CCK18; Contains: Cholecystokinin-12; Short=CCK12; Contains: Cholecystokinin-8; Short=CCK8;…	9	1939624	1943023	1	ENSOCUG00000015676	CCK	CCKN	348
ENSOCUG00000011037	35.6657	-2.0366	0.497655	-4.0924	4.26931e-05	0.00863587	ENSOCUG00000011037.4	myosin heavy chain 7 [Source:HGNC Symbol;Acc:HGNC:7577]	17	43605851	43625678	-1	MYH7		MYH7	5930
ENSOCUG00000012436	140.756	-2.0318	0.425992	-4.76959	1.84604e-06	0.000840178	ENSOCUG00000012436.2	gap junction protein gamma 3 [Source:HGNC Symbol;Acc:HGNC:17495]	GL018760	245261	268501	1	GJC3		GJC3	828
ENSOCUG00000003638	152.768	-1.89104	0.397163	-4.76136	1.92289e-06	0.000848637	ENSOCUG00000003638.4	gamma-aminobutyric acid type A receptor beta3 subunit [Source:HGNC Symbol;Acc:HGNC:4083]	17	79487698	79720557	1	GABRB3	GABRB3	GABRB3	1626
ENSOCUG00000000087	41.8016	-1.87758	0.507418	-3.70027	0.000215372	0.0270404	ENSOCUG00000000087.3	TLC domain containing 2 [Source:HGNC Symbol;Acc:HGNC:33522]	19	16439748	16441528	1	TLCD2		TLCD2	1029
ENSOCUG00000004890	246.208	-1.70645	0.429017	-3.97759	6.96174e-05	0.0126739	ENSOCUG00000004890.4	solute carrier family 9 member A2 [Source:HGNC Symbol;Acc:HGNC:11072]	2	89730202	89836237	-1	SLC9A2	SLC9A2	SLC9A2	3813
ENSOCUG00000013493	921.644	-1.67696	0.245989	-6.81721	9.28264e-12	3.37981e-08	ENSOCUG00000013493.4	solute carrier family 7 member 1 [Source:HGNC Symbol;Acc:HGNC:11057]	GL018735	2513413	2536658	-1	SLC7A1	SLC7A1	SLC7A1	2941
ENSOCUG00000022202	385.067	-1.65574	0.347143	-4.76963	1.84562e-06	0.000840178	ENSOCUG00000022202.3	Excitatory amino acid transporter 3; AltName: Full=Excitatory amino-acid carrier 1; AltName: Full=Sodium-dependent glutamate/aspartate transporter 3; AltName: Full=Solute carrier family 1 member 1	1	49682734	49768607	-1	SLC1A1	SLC1A1	EAA3	3428
ENSOCUG00000029236	157287	-1.61352	0.424742	-3.79883	0.000145378	0.0197878	ENSOCUG00000029236.2	Aphrodisin; Flags: Precursor	GL018814	5734	26438	-1	ENSOCUG00000029236		APHR	1000
ENSOCUG00000021257	97.2434	-1.57819	0.410929	-3.84056	0.000122756	0.0178782	ENSOCUG00000021257.2	matrilin 3 [Source:HGNC Symbol;Acc:HGNC:6909]	2	169166621	169183977	-1	MATN3		MATN3	1356
ENSOCUG00000006311	1728.88	-1.54563	0.366914	-4.21251	2.52552e-05	0.00619617	ENSOCUG00000006311.3	Protein tyrosine phosphatase type IVA 1; AltName: Full=Protein-tyrosine phosphatase 4a1; AltName: Full=Protein-tyrosine phosphatase of regenerating liver 1; Short=PRL-1; Flags: Precursor	12	50334806	50346062	1	PTP4A1		TP4A1	1938
ENSOCUG00000002998	658.433	-1.44913	0.286103	-5.06507	4.08251e-07	0.00030568	ENSOCUG00000002998.4	protein kinase domain containing, cytoplasmic [Source:HGNC Symbol;Acc:HGNC:25123]	2	144102551	144110565	-1	PKDCC		PKDCC	1373
ENSOCUG00000023299	176.116	-1.42344	0.276652	-5.14522	2.67208e-07	0.000216201	ENSOCUG00000023299.3	Ras-related protein Rab-26	GL019540	796	4843	-1	RAB26		RAB26	1889
ENSOCUG00000031161	478899	-1.40614	0.286035	-4.91598	8.83409e-07	0.000514639	ENSOCUG00000031161.1		GL019280	62742	74947	1				1587
ENSOCUG00000006947	164.646	-1.40105	0.250639	-5.58992	2.2718e-08	3.00786e-05	ENSOCUG00000006947.3	proline rich basic protein 1 [Source:HGNC Symbol;Acc:HGNC:41906]	3	21636159	21639200	-1	PROB1		PROB1	3042
ENSOCUG00000000181	174.99	-1.37469	0.345585	-3.97786	6.95391e-05	0.0126739	ENSOCUG00000000181.3	G protein-coupled receptor 39 [Source:HGNC Symbol;Acc:HGNC:4496]	7	69546063	69765575	1	GPR39		GPR39	1368
ENSOCUG00000000148	417.929	-1.34136	0.273664	-4.90148	9.51153e-07	0.000529517	ENSOCUG00000000148.4	cysteine dioxygenase type 1 [Source:HGNC Symbol;Acc:HGNC:1795]	3	605570	615514	-1	CDO1	CDO1	CDO1	625
ENSOCUG00000012258	1933.64	-1.332	0.356263	-3.73882	0.000184883	0.0243627	ENSOCUG00000012258.4	palmdelphin [Source:HGNC Symbol;Acc:HGNC:15846]	13	64435828	64505540	-1	PALMD	PALMD	PALMD	2583
ENSOCUG00000015927	891.78	-1.31637	0.303408	-4.33862	1.43378e-05	0.00401568	ENSOCUG00000015927.3	Cbp/p300 interacting transactivator with Glu/Asp rich carboxy-terminal domain 4 [Source:HGNC Symbol;Acc:HGNC:18696]	13	125716684	125717235	1	CITED4	CITED4	CITED4	552
ENSOCUG00000023368	213.206	-1.30708	0.268942	-4.86009	1.17334e-06	0.000589258	ENSOCUG00000023368.2	ligand of numb-protein X 1 [Source:HGNC Symbol;Acc:HGNC:6657]	GL018754	656953	760584	1	LNX1		LNX1	2388
ENSOCUG00000026763	1.68384e+06	-1.26288	0.298398	-4.23221	2.31405e-05	0.00581067	ENSOCUG00000026763.2	Lipocalin-1; AltName: Full=Tear lipocalin; Short=Tlc; AltName: Full=Tear prealbumin; Short=TP; AltName: Full=von Ebner gland protein; Short=VEG protein; Flags: Precursor	GL019280	79865	83322	-1	LCN1		LCN1	606
ENSOCUG00000005244	71.9942	-1.19842	0.300684	-3.98563	6.73e-05	0.0126739	ENSOCUG00000005244.3	leucine rich repeat transmembrane neuronal 1 [Source:HGNC Symbol;Acc:HGNC:19408]	2	106015061	106018482	1	LRRTM1		LRRTM1	1725
ENSOCUG00000006310	149.308	-1.19482	0.302796	-3.94595	7.9484e-05	0.013781	ENSOCUG00000006310.4	protein phosphatase, Mg2+/Mn2+ dependent 1J [Source:HGNC Symbol;Acc:HGNC:20785]	13	51443758	51448703	1	PPM1J		PPM1J	1515
ENSOCUG00000000532	5686.4	-1.16903	0.183205	-6.38098	1.75959e-10	4.27112e-07	ENSOCUG00000000532.4	Wnt ligand secretion mediator [Source:HGNC Symbol;Acc:HGNC:30238]	13	98050848	98202052	1	WLS	WLS	WLS	2645
ENSOCUG00000013249	619.815	-1.16473	0.276652	-4.21009	2.55267e-05	0.00619617	ENSOCUG00000013249.4	Glutaredoxin-2, mitochondrial; Flags: Precursor	16	77709917	77734723	1	GLRX2		GLRX2	1016
ENSOCUG00000027203	6529.84	-1.15563	0.309178	-3.73774	0.000185681	0.0243627	ENSOCUG00000027203.3	alpha-2-glycoprotein 1, zinc-binding [Source:HGNC Symbol;Acc:HGNC:910]	GL018760	240397	247370	-1	AZGP1		AZGP1	2112
ENSOCUG00000031290	71.7285	-1.14687	0.321603	-3.56612	0.000362307	0.0385157	ENSOCUG00000031290.1	Transmembrane protein 254	GL019059	103764	106524	-1			TM254	262
ENSOCUG00000002935	926.887	-1.12827	0.287778	-3.92062	8.83208e-05	0.014887	ENSOCUG00000002935.2		13	46631126	46632286	1	TENT5C			1161
ENSOCUG00000012588	448.767	-1.12602	0.30639	-3.67511	0.000237743	0.0293431	ENSOCUG00000012588.3	ras homolog family member U [Source:HGNC Symbol;Acc:HGNC:17794]	GL018850	161795	172821	1	RHOU		RHOU	1115
ENSOCUG00000014455	259.8	-1.10453	0.271278	-4.07158	4.66943e-05	0.00931584	ENSOCUG00000014455.4	Oryctolagus cuniculus ectonucleotide pyrophosphatase/phosphodiesterase 1 (ENPP1), mRNA. [Source:RefSeq mRNA;Acc:NM_001082742]	12	122053563	122126277	1	ENPP1			2727
ENSOCUG00000011148	1073.2	-1.07186	0.30535	-3.51025	0.000447689	0.0435591	ENSOCUG00000011148.4	dihydropyrimidinase [Source:HGNC Symbol;Acc:HGNC:3013]	3	119724166	119836695	-1	DPYS		DPYS	2010
ENSOCUG00000016506	534.17	-1.02733	0.24186	-4.24764	2.16038e-05	0.00551996	ENSOCUG00000016506.3	plexin B3 [Source:HGNC Symbol;Acc:HGNC:9105]	GL018816	643508	654720	-1	PLXNB3		PLXNB3	5535
ENSOCUG00000025005	157.349	-1.01514	0.286796	-3.5396	0.000400737	0.0408843	ENSOCUG00000025005.3	arylsulfatase family member I [Source:HGNC Symbol;Acc:HGNC:32521]	3	32053523	32059560	-1	ARSI	ARSI	ARSI	2253
ENSOCUG00000029576	143.311	-1.01139	0.231366	-4.37138	1.23463e-05	0.00374607	ENSOCUG00000029576.2	catenin alpha 2 [Source:HGNC Symbol;Acc:HGNC:2510]	2	105627407	106897864	-1	CTNNA2		CTNNA2	3678
ENSOCUG00000026908	141.691	-1.00748	0.293644	-3.43097	0.000601432	0.0497685	ENSOCUG00000026908.1	Cytochrome c oxidase subunit 8B, mitochondrial; AltName: Full=Cytochrome c oxidase polypeptide VIII-heart; AltName: Full=Cytochrome c oxidase subunit 8-1; AltName: Full=Cytochrome c oxidase subunit 8H; Flags: Precursor	GL019355	17294	18469	1	ENSOCUG00000026908		COX8B	306
ENSOCUG00000001685	1425.2	-0.996466	0.228769	-4.35576	1.32604e-05	0.00382538	ENSOCUG00000001685.3	Oryctolagus cuniculus solute carrier family 7 member 8 (SLC7A8), mRNA. [Source:RefSeq mRNA;Acc:NM_001082682]	17	43347405	43407052	-1	SLC7A8	SLC7A8	SLC7A8	4036
ENSOCUG00000012213	435.523	-0.972585	0.261479	-3.71955	0.00019958	0.0256175	ENSOCUG00000012213.4	dynein cytoplasmic 1 intermediate chain 1 [Source:HGNC Symbol;Acc:HGNC:2963]	10	33092647	33495275	-1	DYNC1I1		DYNC1I1	2293
ENSOCUG00000012747	338.178	-0.94452	0.273381	-3.45495	0.000550388	0.0477134	ENSOCUG00000012747.3	protein kinase cAMP-dependent type II regulatory subunit beta [Source:HGNC Symbol;Acc:HGNC:9392]	7	43507712	43637006	1	PRKAR2B	PRKAR2B	PRKAR2B	1757
ENSOCUG00000005292	1051.1	-0.941648	0.245513	-3.83542	0.000125349	0.0180751	ENSOCUG00000005292.4	tripartite motif containing 2 [Source:HGNC Symbol;Acc:HGNC:15974]	15	9399225	9635399	1	TRIM2	MND1	TRIM2	3805
ENSOCUG00000017093	158.548	-0.923697	0.250907	-3.68143	0.00023193	0.0288704	ENSOCUG00000017093.4	testis expressed 15, meiosis and synapsis associated [Source:HGNC Symbol;Acc:HGNC:11738]	2	76816569	76908344	1	TEX15	TEX15	TEX15	10091
ENSOCUG00000003788	262.401	-0.911845	0.241139	-3.78142	0.000155939	0.0210287	ENSOCUG00000003788.4	sarcoglycan gamma [Source:HGNC Symbol;Acc:HGNC:10809]	8	41423762	41567952	-1	SGCG		SGCG	1710
ENSOCUG00000009395	250.944	-0.886567	0.220768	-4.01584	5.92343e-05	0.0113512	ENSOCUG00000009395.4	contactin 1 [Source:HGNC Symbol;Acc:HGNC:2171]	8	4836356	5065616	-1	CNTN1	CNTN1	CNTN1	4155
ENSOCUG00000010852	348.482	-0.865519	0.223089	-3.8797	0.000104587	0.0162043	ENSOCUG00000010852.3	heat shock protein family B (small) member 7 [Source:HGNC Symbol;Acc:HGNC:5249]	GL018791	351278	353536	1	HSPB7		HSPB7	726
ENSOCUG00000010531	583.899	-0.857267	0.208059	-4.12031	3.78355e-05	0.00798603	ENSOCUG00000010531.4	potassium channel tetramerization domain containing 15 [Source:HGNC Symbol;Acc:HGNC:23297]	5	3640927	3653764	1	KCTD15	KCTD15	KCTD15	2103
ENSOCUG00000026383	788.468	-0.854298	0.196231	-4.35354	1.33957e-05	0.00382538	ENSOCUG00000026383.3	aldo-keto reductase family 1 member B10 [Source:HGNC Symbol;Acc:HGNC:382]	7	13033140	13044196	1	AKR1B10	AKR1B10	AKR1B10	1387
ENSOCUG00000006573	227.176	-0.836407	0.225938	-3.70193	0.000213964	0.0270404	ENSOCUG00000006573.4	secretory carrier membrane protein 5 [Source:HGNC Symbol;Acc:HGNC:30386]	GL018768	1202948	1208388	-1	SCAMP5		SCAMP5	906
ENSOCUG00000006861	172.019	-0.798169	0.219098	-3.64298	0.000269497	0.0309716	ENSOCUG00000006861.4	protein phosphatase 2 regulatory subunit Bbeta [Source:HGNC Symbol;Acc:HGNC:9305]	3	28594615	29080986	-1	PPP2R2B		PPP2R2B	2410
ENSOCUG00000010841	363.745	-0.751667	0.21648	-3.47222	0.000516174	0.0458732	ENSOCUG00000010841.4	solute carrier family 25 member 35 [Source:HGNC Symbol;Acc:HGNC:31921]	19	10986691	10991106	1	SLC25A35		SLC25A35	2526
ENSOCUG00000006262	2205.26	-0.751365	0.19729	-3.80842	0.000139858	0.019216	ENSOCUG00000006262.4	SUB1 regulator of transcription [Source:HGNC Symbol;Acc:HGNC:19985]	11	54376130	54391640	1	SUB1	SUB1	SUB1	691
ENSOCUG00000009775	304.122	-0.741792	0.212288	-3.49427	0.000475362	0.0446854	ENSOCUG00000009775.4	testis expressed 14, intercellular bridge forming factor [Source:HGNC Symbol;Acc:HGNC:11737]	19	29650137	29724369	1	TEX14		TEX14	4328
ENSOCUG00000013058	297.589	-0.721278	0.203662	-3.54154	0.000397804	0.0408843	ENSOCUG00000013058.3	E3 ubiquitin-protein ligase RNF149; AltName: Full=Goliath-related E3 ubiquitin-protein ligase 4; AltName: Full=RING finger protein 149; AltName: Full=RING-type E3 ubiquitin transferase RNF149; Flags: Precursor	2	91100937	91112529	1	RNF149		RN149	697
ENSOCUG00000001212	1924.2	-0.709289	0.181209	-3.91421	9.07011e-05	0.014887	ENSOCUG00000001212.3	Jun proto-oncogene, AP-1 transcription factor subunit [Source:HGNC Symbol;Acc:HGNC:6204]	13	107996928	108032966	1	JUN		JUN	1484
ENSOCUG00000013679	299.379	-0.691986	0.198518	-3.48575	0.000490755	0.0451067	ENSOCUG00000013679.3	Transmembrane protein 254	GL018716	9795	12867	-1	TMEM254		TM254	571
ENSOCUG00000007948	1162.14	-0.660806	0.1878	-3.51867	0.000433713	0.04297	ENSOCUG00000007948.4	microtubule associated protein 1B [Source:HGNC Symbol;Acc:HGNC:6836]	GL018720	793284	967192	1	MAP1B	MAP1B	MAP1B	8945
ENSOCUG00000021388	625.302	-0.640547	0.179977	-3.55905	0.000372195	0.0389975	ENSOCUG00000021388.3	purinergic receptor P2X 1 [Source:HGNC Symbol;Acc:HGNC:8533]	19	14613374	14628494	1	P2RX1	P2RX1	P2RX1	1587
ENSOCUG00000011415	727.966	-0.616976	0.174329	-3.53914	0.000401432	0.0408843	ENSOCUG00000011415.4	transforming growth factor beta 3 [Source:HGNC Symbol;Acc:HGNC:11769]	20	29184036	29208373	1	TGFB3		TGFB3	2377
ENSOCUG00000014657	535.98	-0.555907	0.160151	-3.47114	0.000518254	0.0458732	ENSOCUG00000014657.4	EGF containing fibulin extracellular matrix protein 1 [Source:HGNC Symbol;Acc:HGNC:3218]	2	130180085	130276334	1	EFEMP1	EFEMP1	EFEMP1	1685
ENSOCUG00000017893	1372.59	-0.534147	0.152131	-3.51109	0.000446278	0.0435591	ENSOCUG00000017893.4	solute carrier family 35 member B2 [Source:HGNC Symbol;Acc:HGNC:16872]	12	33633763	33636456	-1	SLC35B2		SLC35B2	1861
ENSOCUG00000023520	600.474	-0.529098	0.152961	-3.45905	0.000542093	0.0472757	ENSOCUG00000023520.2	Leucine-rich repeat transmembrane protein FLRT1; AltName: Full=Fibronectin-like domain-containing leucine-rich transmembrane protein 1; Flags: Precursor	GL019379	9634	11661	-1	FLRT1		FLRT1	2028
ENSOCUG00000007039	5497.59	0.590441	0.161488	3.65626	0.000255921	0.0303286	ENSOCUG00000007039.4	Complement C4-A; AltName: Full=Acidic complement C4; AltName: Full=C3 and PZP-like alpha-2-macroglobulin domain-containing protein 2; Contains: Complement C4 beta chain; Contains: Complement C4-A alpha chain; Contains: C4a anaphylatoxin; Contains: C4b-A; Contains: C4d-A; Contains: Complement C4 gamma chain; Flags: Precursor	12	20807100	20833298	1	C4A		CO4A	5368
ENSOCUG00000026628	978.713	0.64623	0.156987	4.11646	3.84738e-05	0.00800474	ENSOCUG00000026628.3	BCL3 transcription coactivator [Source:HGNC Symbol;Acc:HGNC:998]	GL019011	15500	24763	1	BCL3		BCL3	1756
ENSOCUG00000012438	876.289	0.694577	0.198661	3.49628	0.000471787	0.0446854	ENSOCUG00000012438.3	neurobeachin like 2 [Source:HGNC Symbol;Acc:HGNC:31928]	9	14982429	15010936	1	NBEAL2		NBEAL2	8796
ENSOCUG00000007048	265.277	0.69729	0.193324	3.60685	0.000309933	0.0336856	ENSOCUG00000007048.4	kinase suppressor of ras 1 [Source:HGNC Symbol;Acc:HGNC:6465]	19	20314090	20378351	-1	KSR1		KSR1	3556
ENSOCUG00000016252	556.269	0.697931	0.182144	3.83176	0.000127232	0.0181668	ENSOCUG00000016252.4	V-set immunoregulatory receptor [Source:HGNC Symbol;Acc:HGNC:30085]	18	15514879	15534211	1	VSIR	VSIR	VSIR	2093
ENSOCUG00000005208	547.955	0.702668	0.180012	3.90345	9.48295e-05	0.0153455	ENSOCUG00000005208.3	Bifunctional methylenetetrahydrofolate dehydrogenase/cyclohydrolase, mitochondrial; Includes: NAD-dependent methylenetetrahydrofolate dehydrogenase; Includes: Methenyltetrahydrofolate cyclohydrolase; Flags: Precursor	2	112299887	112311223	-1	MTHFD2	MTHFD2	MTDC	1053
ENSOCUG00000014527	747.517	0.708207	0.171237	4.13584	3.53666e-05	0.00780423	ENSOCUG00000014527.4	cathepsin C [Source:HGNC Symbol;Acc:HGNC:2528]	1	128451964	128546594	1	CTSC	CTSC	CTSC	2024
ENSOCUG00000037529	2825.97	0.72406	0.204528	3.54015	0.000399901	0.0408843	ENSOCUG00000037529.1		GL018778	1079017	1080836	-1				1667
ENSOCUG00000010563	2589.85	0.731535	0.201883	3.62356	0.000290578	0.0323052	ENSOCUG00000010563.3	TAP binding protein [Source:HGNC Symbol;Acc:HGNC:11566]	12	23707905	23720615	-1	TAPBP		TAPBP	3275
ENSOCUG00000014127	846.727	0.769474	0.221323	3.4767	0.000507629	0.0458732	ENSOCUG00000014127.4	TNF receptor superfamily member 1B [Source:HGNC Symbol;Acc:HGNC:11917]	GL018739	1901647	1931846	-1	TNFRSF1B	TNFRSF1B	TNFRSF1B	2140
ENSOCUG00000021002	577.132	0.771972	0.221984	3.4776	0.000505919	0.0458732	ENSOCUG00000021002.1	lipocalin 2 [Source:HGNC Symbol;Acc:HGNC:6526]	GL018847	453615	456754	-1	LCN2	LCN2	LCN2	760
ENSOCUG00000014931	877.674	0.785404	0.173395	4.52957	5.91025e-06	0.0022071	ENSOCUG00000014931.4	Guanylate-binding protein 4; AltName: Full=GTP-binding protein 3; Short=GBP-3; AltName: Full=GTP-binding protein 4; Short=GBP-4; AltName: Full=Guanine nucleotide-binding protein 4; AltName: Full=Guanylate-binding protein 3	13	75163778	75264195	1	GBP4		GBP4	2259
ENSOCUG00000007820	908.176	0.787747	0.215468	3.65597	0.000256209	0.0303286	ENSOCUG00000007820.4	endoplasmic reticulum aminopeptidase 1 [Source:HGNC Symbol;Acc:HGNC:18173]	11	16482844	16624564	-1	ERAP1		ERAP1	4501
ENSOCUG00000029212	135.924	0.808012	0.231247	3.49415	0.000475573	0.0446854	ENSOCUG00000029212.2	Tetratricopeptide repeat protein 38; Short=TPR repeat protein 38	GL018928	187674	294501	1	TTC38		TTC38	2182
ENSOCUG00000006592	664.594	0.811179	0.179931	4.50827	6.53589e-06	0.00232168	ENSOCUG00000006592.4	Eukaryotic translation initiation factor 2 subunit 3, X-linked; AltName: Full=Eukaryotic translation initiation factor 2 subunit gamma, X-linked; Short=eIF-2-gamma; Short=eIF-2-gamma X; AltName: Full=PP42	X	9983507	10000107	1	EIF2S3		IF2G	1712
ENSOCUG00000002367	222.802	0.813235	0.233364	3.48483	0.000492444	0.0451067	ENSOCUG00000002367.3	nectin cell adhesion molecule 4 [Source:HGNC Symbol;Acc:HGNC:19688]	13	31899595	31914411	1	NECTIN4		NECTIN4	1530
ENSOCUG00000005255	260.982	0.835476	0.228006	3.66427	0.000248043	0.0298553	ENSOCUG00000005255.4	Interleukin-18; Short=IL-18; AltName: Full=Interferon gamma-inducing factor; Short=IFN-gamma-inducing factor; AltName: Full=Interleukin-1 gamma; Short=IL-1 gamma; Flags: Precursor	1	104208433	104234438	1	IL18		IL18	1294
ENSOCUG00000002553	324.513	0.858994	0.247303	3.47345	0.00051381	0.0458732	ENSOCUG00000002553.4	elastin microfibril interfacer 2 [Source:HGNC Symbol;Acc:HGNC:19881]	9	59137437	59201529	-1	EMILIN2	EMILIN2	EMILIN2	4155
ENSOCUG00000022167	190.003	0.862396	0.244494	3.52727	0.000419868	0.0419401	ENSOCUG00000022167.2	complement C5a receptor 1 [Source:HGNC Symbol;Acc:HGNC:1338]	GL018835	582482	583528	1	C5AR1		C5AR1	1047
ENSOCUG00000029644	2214.53	0.888859	0.178277	4.98582	6.16995e-07	0.000387896	ENSOCUG00000029644.2	intercellular adhesion molecule 1 [Source:HGNC Symbol;Acc:HGNC:5344]	GL018833	98071	106836	-1	ICAM1	ICAM1	ICAM1	2832
ENSOCUG00000013423	117.132	0.933283	0.268928	3.47039	0.000519712	0.0458732	ENSOCUG00000013423.4	STEAP3 metalloreductase [Source:HGNC Symbol;Acc:HGNC:24592]	7	63640013	63667505	-1	STEAP3		STEAP3	1497
ENSOCUG00000013587	429.615	0.942052	0.2729	3.452	0.000556448	0.0479533	ENSOCUG00000013587.4	interleukin 10 receptor subunit alpha [Source:HGNC Symbol;Acc:HGNC:5964]	GL018782	122560	131860	1	IL10RA		IL10RA	3254
ENSOCUG00000003367	370.139	0.954553	0.20331	4.69506	2.6653e-06	0.00104912	ENSOCUG00000003367.2	toll like receptor 2 [Source:HGNC Symbol;Acc:HGNC:11848]	15	9907319	9921220	1	TLR2	TLR2	TLR2	3255
ENSOCUG00000027310	110.013	0.95839	0.273861	3.49955	0.000466053	0.0446552	ENSOCUG00000027310.3	solute carrier family 16 member 3 [Source:HGNC Symbol;Acc:HGNC:10924]	GL019266	41051	47991	-1	SLC16A3	SLC16A3	SLC16A3	1681
ENSOCUG00000031877	397.432	0.985294	0.247574	3.9798	6.89736e-05	0.0126739	ENSOCUG00000031877.1	P-selectin glycoprotein ligand 1; Short=PSGL-1; AltName: Full=Selectin P ligand; AltName: CD_antigen=CD162; Flags: Precursor	GL018777	346212	347633	1			SELPL	1422
ENSOCUG00000002489	2859.06	1.01662	0.264101	3.84934	0.000118435	0.0178782	ENSOCUG00000002489.4	Antigen peptide transporter 2; Short=APT2; AltName: Full=ATP-binding cassette sub-family B member 3; AltName: Full=Peptide supply factor 2; AltName: Full=Peptide transporter PSF2; Short=PSF-2; AltName: Full=Peptide transporter TAP2; AltName: Full=Peptide transporter involved in antigen processing 2; AltName: Full=Really interesting new gene 11 protein	12	23346548	23354611	-1	TAP2		TAP2	2120
ENSOCUG00000000632	65.8671	1.018	0.290055	3.50969	0.000448631	0.0435591	ENSOCUG00000000632.2	claudin 23 [Source:HGNC Symbol;Acc:HGNC:17591]	GL018709	3369806	3370702	1	CLDN23	CLDN23	CLDN23	897
ENSOCUG00000034337	184.149	1.05385	0.23448	4.49443	6.97552e-06	0.00241884	ENSOCUG00000034337.1	Ig kappa chain V region 3547	2	98574506	98577485	-1			KV13	474
ENSOCUG00000032755	132.798	1.0609	0.295926	3.58501	0.000337066	0.0360958	ENSOCUG00000032755.1	T-lymphocyte surface antigen Ly-9; AltName: Full=Cell surface molecule Ly-9; AltName: Full=Lymphocyte antigen 9; AltName: Full=SLAM family member 3; Short=SLAMF3; AltName: Full=Signaling lymphocytic activation molecule 3; AltName: CD_antigen=CD229; Flags: Precursor	13	35787401	35803545	-1			LY9	1197
ENSOCUG00000002131	2688.77	1.11027	0.288983	3.84199	0.000122043	0.0178782	ENSOCUG00000002131.4	proteasome 20S subunit beta 8 [Source:HGNC Symbol;Acc:HGNC:9545]	12	23356988	23360280	-1	PSMB8		PSMB8	831
ENSOCUG00000034712	193.033	1.13708	0.310092	3.66692	0.000245489	0.0297942	ENSOCUG00000034712.1	Ig kappa chain V region 3368	2	98502071	98514288	-1			KV12	264
ENSOCUG00000015495	174.427	1.15882	0.328346	3.52925	0.000416732	0.0419401	ENSOCUG00000015495.4	PR/SET domain 1 [Source:HGNC Symbol;Acc:HGNC:9346]	12	94204287	94373927	1	PRDM1	PRDM1	PRDM1	4056
ENSOCUG00000012739	170.023	1.16158	0.272913	4.25624	2.0789e-05	0.00550493	ENSOCUG00000012739.4	phosphatidylinositol-4,5-bisphosphate 3-kinase catalytic subunit gamma [Source:HGNC Symbol;Acc:HGNC:8978]	7	43351783	43400268	1	PIK3CG	PIK3CG	PIK3CG	5634
ENSOCUG00000007503	368.268	1.16193	0.335609	3.46217	0.000535845	0.0470123	ENSOCUG00000007503.4	Caspase-13; Short=CASP-13; AltName: Full=Evolutionary related interleukin-1-beta-converting enzyme; Short=ERICE; Contains: Caspase-13 subunit 1; Contains: Caspase-13 subunit 2; Flags: Precursor	1	111587561	111601277	1	CASP4		CASPD	1140
ENSOCUG00000005408	133.849	1.17231	0.312721	3.74873	0.000177734	0.0237479	ENSOCUG00000005408.4	Sialic acid-binding Ig-like lectin 5; Short=Siglec-5; AltName: Full=CD33 antigen-like 2; AltName: Full=Obesity-binding protein 2; Short=OB-BP2; Short=OB-binding protein 2; AltName: CD_antigen=CD170; Flags: Precursor	GL018792	19807	43287	-1	SIGLEC5		SIGL5	2962
ENSOCUG00000026373	16659.9	1.17389	0.235058	4.99405	5.91248e-07	0.000387896	ENSOCUG00000026373.3	Ig alpha chain C region	AAGW02083105	542	2571	-1	MH120864		IGHA	1473
ENSOCUG00000025103	252.748	1.19334	0.309037	3.86148	0.000112701	0.0172777	ENSOCUG00000025103.3	Ig kappa chain V region K16-167	2	98629914	98636003	-1	IGK		KV14	465
ENSOCUG00000027219	24445.3	1.20132	0.206265	5.82416	5.74023e-09	9.28896e-06	ENSOCUG00000027219.1	joining chain of multimeric IgA and IgM [Source:HGNC Symbol;Acc:HGNC:5713]	15	79302092	79312845	1	JCHAIN	JCHAIN	JCHAIN	741
ENSOCUG00000037305	161.437	1.24368	0.249786	4.97898	6.39213e-07	0.000387896	ENSOCUG00000037305.1	Ig kappa chain V region 12F2; Flags: Precursor	AAGW02079587	38373	46447	1			KV10	369
ENSOCUG00000003924	655.536	1.24957	0.318878	3.91864	8.90482e-05	0.014887	ENSOCUG00000003924.3	Apolipoprotein L3; AltName: Full=Apolipoprotein L-III; Short=ApoL-III; AltName: Full=TNF-inducible protein CG12-1; Short=CG12_1	4	85496380	85502028	1	APOL3		APOL3	1874
ENSOCUG00000014373	68.9496	1.25033	0.346948	3.6038	0.000313595	0.0338311	ENSOCUG00000014373.4	C4b-binding protein alpha chain; Short=C4bp; AltName: Full=Proline-rich protein; Short=PRP; Flags: Precursor	16	65224315	65313933	-1	C4BPA	C4BPA	C4BPA	2224
ENSOCUG00000009374	469.422	1.25956	0.304074	4.14228	3.43875e-05	0.00770492	ENSOCUG00000009374.4	interferon regulatory factor 4 [Source:HGNC Symbol;Acc:HGNC:6119]	GL018747	1066655	1083380	1	IRF4		IRF4	2874
ENSOCUG00000015757	206.129	1.30349	0.267745	4.86843	1.1249e-06	0.000585111	ENSOCUG00000015757.3	Serine/threonine-protein kinase pim-2	X	33567967	33572079	-1	PIM2		PIM2	936
ENSOCUG00000024216	540.432	1.31359	0.376739	3.48674	0.000488954	0.0451067	ENSOCUG00000024216.3	Unconventional myosin-Ig; Contains: Minor histocompatibility antigen HA-2; Short=mHag HA-2	10	45213628	45220698	-1	MYO1G		MYO1G	1760
ENSOCUG00000012798	61.3449	1.35649	0.387598	3.49975	0.000465694	0.0446552	ENSOCUG00000012798.3		13	134336768	134339082	-1	ENSOCUG00000012798			2310
ENSOCUG00000026988	1751.71	1.36219	0.354244	3.84534	0.000120386	0.0178782	ENSOCUG00000026988.3	chitinase 3 like 1 [Source:HGNC Symbol;Acc:HGNC:1932]	16	68595451	68601787	1	CHI3L1	CHI3L1	CHI3L1	1667
ENSOCUG00000032756	1756.84	1.37346	0.271447	5.05976	4.19775e-07	0.00030568	ENSOCUG00000032756.1	Ig kappa chain V region 4135	AAGW02082420	722	13447	1			KV04	2202
ENSOCUG00000039640	111.736	1.39289	0.406265	3.42853	0.000606849	0.049933	ENSOCUG00000039640.1	Unconventional myosin-Ig; Contains: Minor histocompatibility antigen HA-2; Short=mHag HA-2	10	45223383	45226489	-1			MYO1G	824
ENSOCUG00000037221	83.7416	1.41025	0.40965	3.44257	0.000576208	0.0491022	ENSOCUG00000037221.1	Ig kappa chain V region 2717	2	98635264	98639452	-1			KV01	468
ENSOCUG00000006720	64.9944	1.4133	0.336843	4.19571	2.72019e-05	0.00649456	ENSOCUG00000006720.4	FYVE, RhoGEF and PH domain containing 2 [Source:HGNC Symbol;Acc:HGNC:3664]	12	26879619	26900616	1	FGD2		FGD2	3289
ENSOCUG00000008307	305.355	1.41763	0.341379	4.15264	3.28662e-05	0.00748026	ENSOCUG00000008307.4	Oryctolagus cuniculus CD1d molecule (CD1D), mRNA. [Source:RefSeq mRNA;Acc:NM_001160282]	13	34954808	35073530	-1	CD1A	CD1C	CD1A	1996
ENSOCUG00000031913	1612.5	1.43049	0.170608	8.38468	5.08659e-17	3.46628e-13	ENSOCUG00000031913.1	Ig kappa chain V region K16-167	2	98720549	98883092	-1			KV14	4464
ENSOCUG00000035196	1273.84	1.43201	0.360717	3.9699	7.19034e-05	0.0129284	ENSOCUG00000035196.1	Ig kappa chain V region 12F2; Flags: Precursor	AAGW02079587	4120	76427	1			KV10	1893
ENSOCUG00000039645	16534.8	1.4454	0.32003	4.51646	6.28832e-06	0.00228958	ENSOCUG00000039645.1	Ig alpha chain C region	GL019873	10026	11338	-1			IGHA	393
ENSOCUG00000006954	69.5933	1.44543	0.329532	4.3863	1.15294e-05	0.00365031	ENSOCUG00000006954.3	perforin 1 [Source:HGNC Symbol;Acc:HGNC:9360]	18	16431601	16434793	1	PRF1		PRF1	1752
ENSOCUG00000036440	593.64	1.47627	0.407787	3.62021	0.000294365	0.0324783	ENSOCUG00000036440.1	Ig kappa chain V region BS-5	2	98807638	98808246	1			KV06	486
ENSOCUG00000036137	64.6813	1.47913	0.330147	4.48021	7.45694e-06	0.00252565	ENSOCUG00000036137.1	T-cell receptor gamma chain C region DFL12	10	21480758	21481093	-1			TCC3	336
ENSOCUG00000033225	335.852	1.49809	0.413355	3.62421	0.000289851	0.0323052	ENSOCUG00000033225.1	Ig kappa chain V region 4135	2	98569337	98852611	-1			KV04	2304
ENSOCUG00000010144	52.98	1.50344	0.347643	4.32466	1.52769e-05	0.00419797	ENSOCUG00000010144.4	tetratricopeptide repeat domain 22 [Source:HGNC Symbol;Acc:HGNC:26067]	13	112126804	112145042	1	TTC22		TTC22	1710
ENSOCUG00000033073	261.45	1.51037	0.38594	3.91348	9.09736e-05	0.014887	ENSOCUG00000033073.1	Oryctolagus cuniculus alcohol dehydrogenase 1A (class I), alpha polypeptide (ADH1A), mRNA. [Source:RefSeq mRNA;Acc:NM_001101704]	15	50425785	50592158	1	ADH6	ADH1	ADH6	1820
ENSOCUG00000023983	197.841	1.51325	0.284587	5.31735	1.05288e-07	0.000109529	ENSOCUG00000023983.2	Ig kappa chain V region K16-167	2	98593538	98597260	-1	KX858713		KV14	429
ENSOCUG00000023831	65.6184	1.51738	0.384249	3.94896	7.84913e-05	0.013781	ENSOCUG00000023831.3	Immunoglobulin heavy variable 3-23; AltName: Full=Ig heavy chain V-III region LAY; AltName: Full=Ig heavy chain V-III region POM; AltName: Full=Ig heavy chain V-III region TEI; AltName: Full=Ig heavy chain V-III region TIL; AltName: Full=Ig heavy chain V-III region TUR; AltName: Full=Ig heavy chain V-III region VH26; AltName: Full=Ig heavy chain V-III region WAS; AltName: Full=Ig heavy chain V-II…	GL019176	25538	123537	-1	ENSOCUG00000023831		HV323	2135
ENSOCUG00000021728	143.306	1.541	0.327298	4.70824	2.49861e-06	0.00101083	ENSOCUG00000021728.3	TNF receptor superfamily member 13B [Source:HGNC Symbol;Acc:HGNC:18153]	GL019019	226786	245245	-1	TNFRSF13B	TNFRSF13B	TNFRSF13B	828
ENSOCUG00000035358	826.283	1.54487	0.327094	4.72301	2.32376e-06	0.000969191	ENSOCUG00000035358.1	Ig kappa chain V region 2717	2	98549286	98693848	-1			KV01	1823
ENSOCUG00000003535	1806.2	1.54869	0.359745	4.30498	1.67004e-05	0.00450416	ENSOCUG00000003535.4	ceruloplasmin [Source:HGNC Symbol;Acc:HGNC:2295]	14	42965454	43043654	-1	CP	CP	CP	4168
ENSOCUG00000013533	226970	1.57657	0.413771	3.81025	0.000138824	0.019216	ENSOCUG00000013533.4	immunoglobulin heavy constant mu [Source:HGNC Symbol;Acc:HGNC:5541]	GL019133	22843	177486	-1	IGHM	IGHM	IGHM	2091
ENSOCUG00000027043	78.4262	1.59898	0.387226	4.12933	3.63828e-05	0.00789517	ENSOCUG00000027043.2	Ig kappa chain V region 2717	2	98488694	98506370	-1	ENSOCUG00000027043		KV01	1534
ENSOCUG00000037670	61.789	1.62696	0.473459	3.43633	0.000589657	0.049355	ENSOCUG00000037670.1	Ig kappa chain V region 3368	2	98568360	98591664	-1			KV12	333
ENSOCUG00000008639	65.4927	1.64719	0.317953	5.1806	2.21176e-07	0.000189482	ENSOCUG00000008639.4	BCL2 interacting protein 5 [Source:HGNC Symbol;Acc:HGNC:33769]	12	26341008	26351035	-1	BNIP5		BNIP5	1956
ENSOCUG00000008721	243.699	1.68489	0.405743	4.1526	3.28712e-05	0.00748026	ENSOCUG00000008721.4	major histocompatibility complex, class II, DP beta 1 [Source:HGNC Symbol;Acc:HGNC:4940]	12	23554108	23560778	1	HLA-DPB1	HLA-DPB1	HLA-DPB1	1036
ENSOCUG00000036147	512.193	1.70778	0.298079	5.72928	1.00859e-08	1.46891e-05	ENSOCUG00000036147.1		2	98905119	98907413	1				1052
ENSOCUG00000013559	31.1751	1.73941	0.473753	3.67155	0.000241084	0.0295054	ENSOCUG00000013559.4	SLAM family member 7 [Source:HGNC Symbol;Acc:HGNC:21394]	13	32323301	32338849	-1	SLAMF7	SLAMF7	SLAMF7	1020
ENSOCUG00000006582	1186.15	1.77601	0.436661	4.06725	4.75716e-05	0.0093626	ENSOCUG00000006582.4	Phospholipase A2, membrane associated; AltName: Full=GIIC sPLA2; AltName: Full=Group IIA phospholipase A2; AltName: Full=Non-pancreatic secretory phospholipase A2; Short=NPS-PLA2; AltName: Full=Phosphatidylcholine 2-acylhydrolase 2A; Flags: Precursor	13	132920172	132966605	-1	PLA2G2A		PA2GA	1560
ENSOCUG00000025084	38.489	1.79848	0.46329	3.88197	0.000103613	0.0162043	ENSOCUG00000025084.2	RIB43A-like with coiled-coils protein 1	X	34930606	34939207	1	RIBC1		RIBC1	1736
ENSOCUG00000004766	71.352	1.80787	0.525553	3.43995	0.000581825	0.0491022	ENSOCUG00000004766.3	Leukocyte immunoglobulin-like receptor subfamily A member 6; Short=Leukocyte immunoglobulin-like receptor E; Flags: Precursor	GL018980	47794	301345	-1	ENSOCUG00000004766		LIRA6	1164
ENSOCUG00000015772	1857.75	1.91497	0.391188	4.89528	9.81663e-07	0.000529517	ENSOCUG00000015772.4	chitinase 3 like 2 [Source:HGNC Symbol;Acc:HGNC:1933]	13	52895027	52907348	-1	CHI3L2	CHI3L2	CHI3L2	1354
ENSOCUG00000026113	22.2205	2.02916	0.589996	3.43928	0.000583265	0.0491022	ENSOCUG00000026113.2	fer-1 like family member 6 [Source:HGNC Symbol;Acc:HGNC:28065]	3	139710979	139904183	1	FER1L6		FER1L6	6007
ENSOCUG00000008483	137.769	2.03874	0.578052	3.52691	0.000420438	0.0419401	ENSOCUG00000008483.4	endoplasmic reticulum to nucleus signaling 2 [Source:HGNC Symbol;Acc:HGNC:16942]	6	14411563	14425931	-1	ERN2		ERN2	3069
ENSOCUG00000036945	115.321	2.04584	0.574776	3.55937	0.000371748	0.0389975	ENSOCUG00000036945.1	Protein Wfdc21; AltName: Full=Wdnm1-like protein; Flags: Precursor	19	25079843	25082628	1			WFD21	279
ENSOCUG00000026830	165.276	2.05677	0.569657	3.61054	0.000305562	0.0334602	ENSOCUG00000026830.2	Cornifin alpha [Source:UniProtKB/Swiss-Prot;Acc:P35324]	13	39397586	39397966	-1				381
ENSOCUG00000011658	139.091	2.08086	0.51493	4.04105	5.32128e-05	0.0103332	ENSOCUG00000011658.4	NCCRP1, F-box associated domain containing [Source:HGNC Symbol;Acc:HGNC:33739]	5	710301	712829	-1	NCCRP1		NCCRP1	1119
ENSOCUG00000021677	93.7737	2.09062	0.340243	6.14449	8.02214e-10	1.66906e-06	ENSOCUG00000021677.3	Ig kappa chain V region 12F2; Flags: Precursor	2	98504663	98506881	1	ENSOCUG00000021677		KV10	2096
ENSOCUG00000023845	106.818	2.12215	0.384238	5.52301	3.33235e-08	3.73326e-05	ENSOCUG00000023845.3	Ig kappa chain V region 3315	2	98615308	98769375	-1	IGK		KV02	450
ENSOCUG00000025053	70.2054	2.19756	0.438727	5.00894	5.47302e-07	0.000379567	ENSOCUG00000025053.3	Ig kappa chain V region 12F2; Flags: Precursor	GL019679	3750	45985	1	IGK		KV10	836
ENSOCUG00000027394	11897.8	2.27587	0.495129	4.59653	4.29587e-06	0.00164645	ENSOCUG00000027394.3	Ig kappa-b4 chain C region	2	98223558	98454000	-1	IGK		KACB	888
ENSOCUG00000023346	21.8216	2.31186	0.634701	3.64243	0.000270076	0.0309716	ENSOCUG00000023346.1	interferon stimulated exonuclease gene 20 [Source:HGNC Symbol;Acc:HGNC:6130]	GL019705	5463	10769	1	ISG20	ISG20	ISG20	546
ENSOCUG00000010608	383.824	2.32931	0.557102	4.18112	2.90075e-05	0.00681395	ENSOCUG00000010608.4	trefoil factor 1 [Source:HGNC Symbol;Acc:HGNC:11755]	AAGW02082501	2835	6252	1	TFF1		TFF1	1336
ENSOCUG00000029292	2486.54	2.33414	0.570088	4.09435	4.23351e-05	0.00863587	ENSOCUG00000029292.2	Immunoglobulin kappa variable 1D-43; Flags: Precursor	2	98129481	98247972	1	IGK		KVD43	2506
ENSOCUG00000023566	302.34	2.42641	0.624036	3.88826	0.000100966	0.0160591	ENSOCUG00000023566.3	Immunoglobulin lambda variable 4-69; Flags: Precursor	21	4564806	4587133	1	IGL		LV469	552
ENSOCUG00000016406	186.13	2.65459	0.676436	3.92437	8.69558e-05	0.014887	ENSOCUG00000016406.4	butyrophilin subfamily 2 member A2 [Source:HGNC Symbol;Acc:HGNC:1137]	12	10710437	10720017	-1	BTN2A2		BTN2A2	1656
ENSOCUG00000015246	130.239	2.70494	0.743722	3.63703	0.000275804	0.0311381	ENSOCUG00000015246.4	cell division cycle 20B [Source:HGNC Symbol;Acc:HGNC:24222]	11	71087990	71143946	-1	CDC20B		CDC20B	2001
ENSOCUG00000038578	125.367	2.82437	0.726598	3.88711	0.000101444	0.0160591	ENSOCUG00000038578.1	Immunoglobulin heavy variable 3-74; Flags: Precursor	GL019739	40733	51205	-1			HV374	940
ENSOCUG00000006366	243.055	2.82451	0.59809	4.72254	2.32915e-06	0.000969191	ENSOCUG00000006366.3	S100 calcium binding protein P [Source:HGNC Symbol;Acc:HGNC:10504]	GL019770	21780	23966	1	S100P		S100P	285
ENSOCUG00000029191	635.265	2.84139	0.542079	5.24164	1.59154e-07	0.000154528	ENSOCUG00000029191.2	Immunoglobulin lambda variable 4-69; Flags: Precursor	21	4589051	4589529	1	IGL		LV469	369
ENSOCUG00000003467	27.619	3.27329	0.858266	3.81385	0.000136821	0.0191602	ENSOCUG00000003467.4	prostate stem cell antigen [Source:HGNC Symbol;Acc:HGNC:9500]	AAGW02083648	3857	5721	1	PSCA		PSCA	763
ENSOCUG00000037457	55.6482	3.45197	0.661847	5.21567	1.83157e-07	0.000166719	ENSOCUG00000037457.1	Immunoglobulin lambda variable 3-25; AltName: Full=Ig lambda chain V-IV region Hil; Flags: Precursor	21	4796451	4796747	1			LV325	297
ENSOCUG00000024787	6168.36	3.46282	0.931275	3.71836	0.000200521	0.0256175	ENSOCUG00000024787.3	Mucin-5AC; Short=MUC-5AC; AltName: Full=Gastric mucin; AltName: Full=Major airway glycoprotein; AltName: Full=Mucin-5 subtype AC, tracheobronchial; AltName: Full=Tracheobronchial mucin; Short=TBM; Flags: Precursor	GL019671	21572	30158	-1	MUC5AC		MUC5A	3069
ENSOCUG00000014290	56.0585	3.47118	0.9312	3.72764	0.00019328	0.0251333	ENSOCUG00000014290.4	dual oxidase maturation factor 2 [Source:HGNC Symbol;Acc:HGNC:32698]	17	27421599	27424623	-1	DUOXA2		DUOXA2	1046
ENSOCUG00000023532	90.6439	3.47643	0.78206	4.44522	8.78018e-06	0.00290624	ENSOCUG00000023532.3	DNA dC->dU-editing enzyme APOBEC-3A; Short=A3A; AltName: Full=Phorbolin-1	4	84344924	84351267	1	ENSOCUG00000023532		ABC3A	1948
ENSOCUG00000025966	31.6179	4.04963	1.05258	3.84732	0.000119415	0.0178782	ENSOCUG00000025966.3	Immunoglobulin lambda variable 5-45; Flags: Precursor	21	4561604	4566098	1	ENSOCUG00000025966		LV545	4386
ENSOCUG00000034823	383.407	4.06798	1.11831	3.63763	0.000275155	0.0311381	ENSOCUG00000034823.1	Immunoglobulin kappa variable 1D-43; Flags: Precursor	2	98160241	98176975	1			KVD43	363
ENSOCUG00000031946	1322.54	4.23174	1.22986	3.44085	0.000579899	0.0491022	ENSOCUG00000031946.1	Immunoglobulin lambda variable 3-9; Flags: Precursor	21	4823740	4828869	1			LV39	417
ENSOCUG00000014883	402.519	5.10531	1.14987	4.43992	8.99934e-06	0.00291259	ENSOCUG00000014883.3	BPI fold containing family B member 3 [Source:HGNC Symbol;Acc:HGNC:16178]	4	6441901	6453367	-1	BPIFB3		BPIFB3	1509
ENSOCUG00000006682	64.9068	5.3072	0.635997	8.34469	7.14009e-17	3.46628e-13	ENSOCUG00000006682.3	ADP/ATP translocase 2; AltName: Full=ADP,ATP carrier protein 2; AltName: Full=Adenine nucleotide translocator 2; Short=ANT 2; AltName: Full=Solute carrier family 25 member 5; Contains: ADP/ATP translocase 2, N-terminally processed	GL018789	984168	985063	1	ENSOCUG00000006682		ADT2	753

## Sheet: CF vs CM adult
Row.names	log2FoldChange	lfcSE	stat	pvalue	padj	Gene.stable.ID.version	Gene.description	Chromosome.scaffold.name	Gene.start..bp.	Gene.end..bp.	Strand	Gene.name	UniProtKB.Gene.Name.symbol	HGNC.symbol	Transcript.length..longest.			up regulated in females
ENSOCUG00000026615	-6.39228	1.5123	-4.22685	2.36984e-05	0.00792243	ENSOCUG00000026615.2	E3 ubiquitin-protein ligase Topors; AltName: Full=RING-type E3 ubiquitin transferase Topors; AltName: Full=SUMO1-protein E3 ligase Topors; AltName: Full=Topoisomerase I-binding RING finger protein; AltName: Full=Topoisomerase I-binding arginine/serine-rich protein; AltName: Full=Tumor suppressor p53-binding protein 3; Short=p53-binding protein 3; Short=p53BP3	1	8788501	8791513	-1	ENSOCUG00000026615		TOPRS	2013			up regulated in males
ENSOCUG00000007514	-4.25917	1.01804	-4.18368	2.86833e-05	0.00937097	ENSOCUG00000007514.4	DnaJ heat shock protein family (Hsp40) member C5 beta [Source:HGNC Symbol;Acc:HGNC:24138]	3	81952904	82008128	1	DNAJC5B	DNAJC5B	DNAJC5B	786
ENSOCUG00000015676	-2.8998	0.493501	-5.87599	4.20333e-09	1.20846e-05	ENSOCUG00000015676.3	Cholecystokinin; Short=CCK; Contains: Cholecystokinin-58; Short=CCK58; Contains: Cholecystokinin-58 desnonopeptide; AltName: Full=(1-49)-CCK58; Contains: Cholecystokinin-39; Short=CCK39; Contains: Cholecystokinin-33; Short=CCK33; Contains: Cholecystokinin-25; Short=CCK25; Contains: Cholecystokinin-18; Short=CCK18; Contains: Cholecystokinin-12; Short=CCK12; Contains: Cholecystokinin-8; Short=CCK8;…	9	1939624	1943023	1	ENSOCUG00000015676	CCK	CCKN	348
ENSOCUG00000012080	-2.3446	0.421867	-5.55769	2.73374e-08	6.54958e-05	ENSOCUG00000012080.3	solute carrier family 18 member A2 [Source:HGNC Symbol;Acc:HGNC:10935]	18	64680736	64710706	1	SLC18A2		SLC18A2	1545
ENSOCUG00000006758	-2.23054	0.469318	-4.75273	2.00684e-06	0.00115394	ENSOCUG00000006758.4	solute carrier family 14 member 1 (Kidd blood group) [Source:HGNC Symbol;Acc:HGNC:10918]	9	87209456	87235674	1	SLC14A1	SLC14A1	SLC14A1	1460
ENSOCUG00000013264	-2.13249	0.517971	-4.11701	3.8382e-05	0.0119944	ENSOCUG00000013264.3	Excitatory amino acid transporter 3; AltName: Full=Excitatory amino-acid carrier 1; AltName: Full=Sodium-dependent glutamate/aspartate transporter 3; AltName: Full=Solute carrier family 1 member 1	1	50011452	50067739	-1	ENSOCUG00000013264		EAA3	1998
ENSOCUG00000015539	-2.00679	0.438315	-4.57841	4.68516e-06	0.00240533	ENSOCUG00000015539.4	Protein eyes shut homolog; AltName: Full=Epidermal growth factor-like protein 10; Short=EGF-like protein 10; AltName: Full=Epidermal growth factor-like protein 11; Short=EGF-like protein 11; AltName: Full=Protein spacemaker homolog; Flags: Precursor	12	50483220	51879614	-1	ENSOCUG00000015539		EYS	7371
ENSOCUG00000010187	-1.73195	0.251783	-6.87875	6.0382e-12	4.33995e-08	ENSOCUG00000010187.4	carbonic anhydrase 9 [Source:HGNC Symbol;Acc:HGNC:1383]	1	18251147	18256037	-1	CA9		CA9	1308
ENSOCUG00000009058	-1.46592	0.297425	-4.92871	8.27747e-07	0.000566613	ENSOCUG00000009058.3	Haptoglobin; Contains: Haptoglobin alpha chain; Contains: Haptoglobin beta chain; Flags: Precursor	5	27498985	27502985	-1	HP	HP	HPT	1260
ENSOCUG00000009732	-1.45338	0.275229	-5.28063	1.28742e-07	0.000154222	ENSOCUG00000016940.3	Oryctolagus cuniculus hemopexin (HPX), mRNA. [Source:RefSeq mRNA;Acc:NM_001082760]	1	147446113	147478615	-1	TRIM3	TRIM3	TRIM3	3948
ENSOCUG00000011816	-1.44019	0.327773	-4.39387	1.11349e-05	0.00444622	ENSOCUG00000011816.4	4-hydroxyphenylpyruvate dioxygenase [Source:HGNC Symbol;Acc:HGNC:5147]	GL018824	775762	783572	1	HPD	HPD	HPD	2008
ENSOCUG00000025864	-1.32912	0.287396	-4.62471	3.75126e-06	0.0019972	ENSOCUG00000025864.2	Major allergen I polypeptide chain 1; AltName: Full=AG4; AltName: Full=Allergen Cat-1; AltName: Full=Allergen Fel d I-A; Short=Allergen FdI; Short=Allergen Fel dI; AltName: Allergen=Fel d 1-A; Flags: Precursor	GL019480	44303	45623	-1	CH1		FEL1A	285
ENSOCUG00000022202	-1.21202	0.232587	-5.21103	1.87796e-07	0.000192529	ENSOCUG00000022202.3	Excitatory amino acid transporter 3; AltName: Full=Excitatory amino-acid carrier 1; AltName: Full=Sodium-dependent glutamate/aspartate transporter 3; AltName: Full=Solute carrier family 1 member 1	1	49682734	49768607	-1	SLC1A1	SLC1A1	EAA3	3428
ENSOCUG00000021110	-1.18679	0.261773	-4.53366	5.79707e-06	0.00277776	ENSOCUG00000021110.3	ubiquitin protein ligase E3D [Source:HGNC Symbol;Acc:HGNC:21381]	12	69853002	70035440	-1	UBE3D	UBE3D	UBE3D	4183
ENSOCUG00000009775	-0.999812	0.24892	-4.0166	5.90441e-05	0.0166423	ENSOCUG00000009775.4	testis expressed 14, intercellular bridge forming factor [Source:HGNC Symbol;Acc:HGNC:11737]	19	29650137	29724369	1	TEX14		TEX14	4328
ENSOCUG00000031161	-0.801435	0.1882	-4.25841	2.05886e-05	0.00721856	ENSOCUG00000031161.1		GL019280	62742	74947	1				1587
ENSOCUG00000014988	-0.738928	0.167556	-4.41002	1.03359e-05	0.00435901	ENSOCUG00000025598.3	LysM domain containing 2 [Source:HGNC Symbol;Acc:HGNC:28571]	17	20800408	20821281	1	LYSMD2	LYSMD2		1160
ENSOCUG00000003212	-0.532434	0.141781	-3.75533	0.000173117	0.0395008	ENSOCUG00000003212.4	tumor suppressor candidate 3 [Source:HGNC Symbol;Acc:HGNC:30242]	2	70266504	70392428	-1	TUSC3		TUSC3	882
ENSOCUG00000005592	0.451182	0.110065	4.09923	4.14521e-05	0.012414	ENSOCUG00000005592.4	Oryctolagus cuniculus lumican (LUM), mRNA. [Source:RefSeq mRNA;Acc:NM_001195680]	4	70315437	70323221	-1	LUM	LUM	LUM	1855
ENSOCUG00000022267	0.500276	0.13133	3.80929	0.000139365	0.0323123	ENSOCUG00000022267.2	dimethylarginine dimethylaminohydrolase 2 [Source:HGNC Symbol;Acc:HGNC:2716]	12	20542283	20545333	-1	DDAH2		DDAH2	1201
ENSOCUG00000024302	0.507383	0.1314	3.86138	0.00011275	0.0273567	ENSOCUG00000024302.1	galectin 1 [Source:HGNC Symbol;Acc:HGNC:6561]	GL018972	7658	11002	1	LGALS1	LGALS1	LGALS1	511
ENSOCUG00000025598	0.531145	0.120397	4.41161	1.02606e-05	0.00435901	ENSOCUG00000014988.4	collagen type III alpha 1 chain [Source:HGNC Symbol;Acc:HGNC:2201]	7	129298064	129340978	1	COL3A1		COL3A1	4775
ENSOCUG00000011137	0.539874	0.131507	4.10528	4.03825e-05	0.012351	ENSOCUG00000011137.3	fibulin 1 [Source:HGNC Symbol;Acc:HGNC:3600]	GL019233	6793	29597	-1	FBLN1		FBLN1	1391
ENSOCUG00000008065	0.540409	0.138583	3.89954	9.63751e-05	0.0247391	ENSOCUG00000008065.4	NBL1, DAN family BMP antagonist [Source:HGNC Symbol;Acc:HGNC:7650]	13	133314081	133316372	-1	NBL1		NBL1	1073
ENSOCUG00000002828	0.556987	0.123117	4.52403	6.06738e-06	0.0028135	ENSOCUG00000002828.3	insulin like growth factor binding protein 4 [Source:HGNC Symbol;Acc:HGNC:5473]	19	41584616	41594406	1	IGFBP4	IGFBP4	IGFBP4	1083
ENSOCUG00000011500	0.576283	0.114443	5.03555	4.76487e-07	0.0003605	ENSOCUG00000011500.4	tenascin C [Source:HGNC Symbol;Acc:HGNC:5318]	GL018699	12582949	12654754	1	TNC	TNC	TNC	7999
ENSOCUG00000015459	0.579725	0.143903	4.02857	5.61171e-05	0.0161337	ENSOCUG00000015459.2	60S ribosomal protein L36a; AltName: Full=60S ribosomal protein L44	2	30418087	30418407	-1	RPL36AL	LOC100358069	RL36A	321
ENSOCUG00000025148	0.617074	0.159935	3.85829	0.000114185	0.0273567	ENSOCUG00000025148.3	Collagen alpha-1(V) chain; Flags: Precursor	GL019578	29112	37589	-1	COL5A1		CO5A1	2152
ENSOCUG00000016159	0.635499	0.166305	3.82129	0.000132756	0.0312847	ENSOCUG00000016159.3		GL019659	17405	18642	1	CHST12			1224
ENSOCUG00000012906	0.651522	0.147929	4.40429	1.06132e-05	0.00435901	ENSOCUG00000012906.4	SPARC-related modular calcium-binding protein 2; AltName: Full=Secreted modular calcium-binding protein 2; Short=SMOC-2; AltName: Full=Smooth muscle-associated protein 2; Short=SMAP-2; Flags: Precursor	GL018930	125741	262332	-1	SMOC2		SMOC2	3864
ENSOCUG00000026333	0.667274	0.172334	3.87199	0.00010795	0.0267548	ENSOCUG00000026333.2	period circadian regulator 1 [Source:HGNC Symbol;Acc:HGNC:8845]	19	11100588	11109342	1	PER1		PER1	3836
ENSOCUG00000011042	0.669822	0.150395	4.45375	8.43827e-06	0.00379063	ENSOCUG00000011042.3	collagen type VIII alpha 2 chain [Source:HGNC Symbol;Acc:HGNC:2216]	GL018704	2222010	2236940	1	COL8A2		COL8A2	2200
ENSOCUG00000000786	0.672958	0.173428	3.88034	0.000104312	0.0263067	ENSOCUG00000000786.4	EPH receptor A2 [Source:HGNC Symbol;Acc:HGNC:3386]	GL018791	240104	264018	1	EPHA2		EPHA2	3576
ENSOCUG00000009702	0.67431	0.182267	3.69957	0.000215967	0.0477619	ENSOCUG00000009702.4	fibromodulin [Source:HGNC Symbol;Acc:HGNC:3774]	16	68442915	68444276	1	FMOD		FMOD	1362
ENSOCUG00000012916	0.678808	0.172755	3.92931	8.51904e-05	0.0231059	ENSOCUG00000012916.4	prolyl 3-hydroxylase 3 [Source:HGNC Symbol;Acc:HGNC:19318]	8	32848402	32862816	1	P3H3		P3H3	2202
ENSOCUG00000003801	0.686965	0.159688	4.30191	1.69329e-05	0.00624131	ENSOCUG00000003801.1	C1q and TNF related 1 [Source:HGNC Symbol;Acc:HGNC:14324]	GL019553	43487	44035	-1	C1QTNF1	C1QTNF1	C1QTNF1	549
ENSOCUG00000013676	0.689179	0.175918	3.91762	8.94285e-05	0.0233734	ENSOCUG00000013676.4	gelsolin [Source:HGNC Symbol;Acc:HGNC:4620]	GL018699	5859160	5898469	-1	GSN		GSN	2642
ENSOCUG00000015039	0.700263	0.17784	3.93759	8.23046e-05	0.0227525	ENSOCUG00000015039.4	fibronectin type III domain containing 1 [Source:HGNC Symbol;Acc:HGNC:21184]	12	149144477	149219448	1	FNDC1		FNDC1	5911
ENSOCUG00000006592	0.70348	0.141693	4.96483	6.87623e-07	0.000494229	ENSOCUG00000006592.4	Eukaryotic translation initiation factor 2 subunit 3, X-linked; AltName: Full=Eukaryotic translation initiation factor 2 subunit gamma, X-linked; Short=eIF-2-gamma; Short=eIF-2-gamma X; AltName: Full=PP42	X	9983507	10000107	1	EIF2S3		IF2G	1712
ENSOCUG00000006714	0.739808	0.153624	4.81571	1.46681e-06	0.000878557	ENSOCUG00000006714.4	matrix metallopeptidase 2 [Source:HGNC Symbol;Acc:HGNC:7166]	5	11717140	11743377	1	MMP2	MMP2	MMP2	3453
ENSOCUG00000005211	0.752739	0.145604	5.16977	2.34386e-07	0.000210581	ENSOCUG00000005211.4	platelet derived growth factor receptor like [Source:HGNC Symbol;Acc:HGNC:8805]	2	68034567	68091456	-1	PDGFRL		PDGFRL	1323
ENSOCUG00000000611	0.753193	0.165096	4.56216	5.06308e-06	0.00250972	ENSOCUG00000000611.4	FKBP prolyl isomerase 10 [Source:HGNC Symbol;Acc:HGNC:18169]	19	42713118	42718967	1	FKBP10		FKBP10	1710
ENSOCUG00000031409	0.759244	0.176944	4.29088	1.77966e-05	0.00639566	ENSOCUG00000031409.1	procollagen C-endopeptidase enhancer [Source:HGNC Symbol;Acc:HGNC:8738]	6	27188476	27193370	-1	PCOLCE		PCOLCE	1382
ENSOCUG00000001035	0.76059	0.141082	5.3911	7.00263e-08	0.000100663	ENSOCUG00000001035.4	ADAM metallopeptidase with thrombospondin type 1 motif 2 [Source:HGNC Symbol;Acc:HGNC:218]	GL018730	577904	831907	-1	ADAMTS2		ADAMTS2	4605
ENSOCUG00000023931	0.79078	0.163371	4.84038	1.29589e-06	0.00084153	ENSOCUG00000023931.3	Oryctolagus cuniculus biglycan (BGN), mRNA. [Source:RefSeq mRNA;Acc:NM_001195691]	GL018816	868363	896614	-1	BGN	BGN	BGN	2102
ENSOCUG00000000409	0.80608	0.147399	5.46868	4.53391e-08	7.24167e-05	ENSOCUG00000000409.4	Collagen alpha-2(VI) chain; Flags: Precursor	14	163843437	163854983	-1	COL6A2		CO6A2	2050
ENSOCUG00000039434	0.809878	0.184717	4.38442	1.16296e-05	0.00451824	ENSOCUG00000039434.1		14	163858770	163860656	-1				1347
ENSOCUG00000013175	0.812318	0.168085	4.83277	1.34645e-06	0.00084153	ENSOCUG00000013175.4	fibulin 5 [Source:HGNC Symbol;Acc:HGNC:3602]	20	13959823	14038823	1	FBLN5	FBLN5	FBLN5	1419
ENSOCUG00000006186	0.814329	0.1479	5.50596	3.67161e-08	6.78275e-05	ENSOCUG00000006186.4	carboxypeptidase X, M14 family member 1 [Source:HGNC Symbol;Acc:HGNC:15771]	4	9806573	9821092	-1	CPXM1	CPXM1	CPXM1	2562
ENSOCUG00000023484	0.834922	0.226311	3.68927	0.000224896	0.0489831	ENSOCUG00000023484.2	HHIP-like protein 1; Flags: Precursor	GL018761	35306	56304	-1	HHIPL1		HIPL1	2262
ENSOCUG00000000313	0.857177	0.138035	6.20986	5.30325e-10	1.90586e-06	ENSOCUG00000000313.4	Ovostatin homolog 2; Flags: Precursor	8	34453884	34504053	1	OVOS2		OVOS2	4311
ENSOCUG00000007472	0.886857	0.161215	5.50108	3.77475e-08	6.78275e-05	ENSOCUG00000007472.4	Collagen alpha-3(VI) chain; Flags: Precursor	GL018840	385376	404728	-1	COL6A3		CO6A3	2640
ENSOCUG00000000585	0.902869	0.212678	4.24524	2.18364e-05	0.00747378	ENSOCUG00000000585.4	RRAD, Ras related glycolysis inhibitor and calcium channel regulator [Source:HGNC Symbol;Acc:HGNC:10446]	5	22312327	22315347	-1	RRAD	RRAD	RRAD	2061
ENSOCUG00000012042	0.927498	0.213231	4.34974	1.36301e-05	0.00515611	ENSOCUG00000012042.4	cochlin [Source:HGNC Symbol;Acc:HGNC:2180]	17	50767229	50784190	1	COCH	COCH	COCH	2006
ENSOCUG00000010111	0.927823	0.179972	5.15538	2.53116e-07	0.000214032	ENSOCUG00000010111.3	prolyl 4-hydroxylase subunit alpha 3 [Source:HGNC Symbol;Acc:HGNC:30135]	1	142283478	142321062	1	P4HA3		P4HA3	2578
ENSOCUG00000007617	0.943624	0.202105	4.66899	3.02683e-06	0.00167349	ENSOCUG00000007617.4	Serotransferrin; Short=Transferrin; AltName: Full=Beta-1 metal-binding globulin; AltName: Full=Siderophilin; Flags: Precursor	14	27655413	27758319	1	TF	LOC100345698	TRFE	2324
ENSOCUG00000004707	0.998356	0.190352	5.2448	1.56453e-07	0.000173	ENSOCUG00000004707.4	olfactomedin 2 [Source:HGNC Symbol;Acc:HGNC:17189]	GL018833	324518	380775	1	OLFM2		OLFM2	1862
ENSOCUG00000034940	1.13345	0.223421	5.07318	3.91214e-07	0.000312427	ENSOCUG00000034940.1	Pikachurin; AltName: Full=EGF-like, fibronectin type-III and laminin G-like domain-containing protein; Flags: Precursor	11	59496394	59511238	1			EGFLA	1087
ENSOCUG00000034823	1.16102	0.295913	3.92352	8.72642e-05	0.02323	ENSOCUG00000034823.1	Immunoglobulin kappa variable 1D-43; Flags: Precursor	2	98160241	98176975	1			KVD43	363
ENSOCUG00000016660	1.17969	0.179326	6.57847	4.75303e-11	2.27749e-07	ENSOCUG00000016660.4	secreted frizzled related protein 2 [Source:HGNC Symbol;Acc:HGNC:10777]	15	10007158	10014838	-1	SFRP2	SFRP2	SFRP2	1770
ENSOCUG00000014907	1.25713	0.302195	4.15999	3.18261e-05	0.0101667	ENSOCUG00000014907.3	WNT inhibitory factor 1 [Source:HGNC Symbol;Acc:HGNC:18081]	4	43863790	44015917	-1	WIF1		WIF1	1695
ENSOCUG00000016638	1.45613	0.355645	4.09435	4.23357e-05	0.0124199	ENSOCUG00000016638.1	fibroblast growth factor binding protein 2 [Source:HGNC Symbol;Acc:HGNC:29451]	2	6565566	6566246	-1	FGFBP2	FGFBP2	FGFBP2	681
ENSOCUG00000016940	1.53584	0.290428	5.28821	1.23522e-07	0.000154222	ENSOCUG00000009732.4	nuclear receptor subfamily 1 group D member 1 [Source:HGNC Symbol;Acc:HGNC:7962]	19	41290746	41298450	-1	NR1D1	NR1D1	NR1D1	2977
ENSOCUG00000007983	2.0166	0.541092	3.72691	0.000193845	0.0435394	ENSOCUG00000007983.3	Troponin C, slow skeletal and cardiac muscles [Source:UniProtKB/Swiss-Prot;Acc:P02591]	9	19523619	19526183	-1	TNNC1	TNNC1	TNNC1	524
ENSOCUG00000035842	2.56993	0.494359	5.1985	2.009e-07	0.000192529	ENSOCUG00000035842.1	Immunoglobulin kappa variable 1D-43; Flags: Precursor	2	98253842	98254438	1			KVD43	474
ENSOCUG00000006682	4.12048	0.503941	8.17651	2.92181e-16	4.2001e-12	ENSOCUG00000006682.3	ADP/ATP translocase 2; AltName: Full=ADP,ATP carrier protein 2; AltName: Full=Adenine nucleotide translocator 2; Short=ANT 2; AltName: Full=Solute carrier family 25 member 5; Contains: ADP/ATP translocase 2, N-terminally processed	GL018789	984168	985063	1	ENSOCUG00000006682		ADT2	753
